# Supplementary material for: CuGaS2–ZnS p–n nanoheterostructures: a promising visible light photo-catalyst for water-splitting hydrogen production
Source: Royal Society of Chemistry journal article supplement (doi:10.1039/c6nr05002f), 2016-01-01
Supplement: c6nr05002f1.pdf [file c6nr05002f1.pdf]

## Electronic Supplementary Information

# **CuGaS<sub>2</sub>-ZnS p-n Nanoheterostructures: A Promising Visible Light Photo-catalyst for Water-splitting Hydrogen Production**

Mingshi Zhao<sup>ab</sup>, Feng Huang<sup>\*ac</sup>, Hang Lin<sup>ac</sup>, Jiangcong Zhou<sup>a</sup>, Ju Xu<sup>ac</sup>, Qingping Wu<sup>ac</sup>, Yuansheng Wang<sup>\*ac</sup>

**Figure S1-S2**

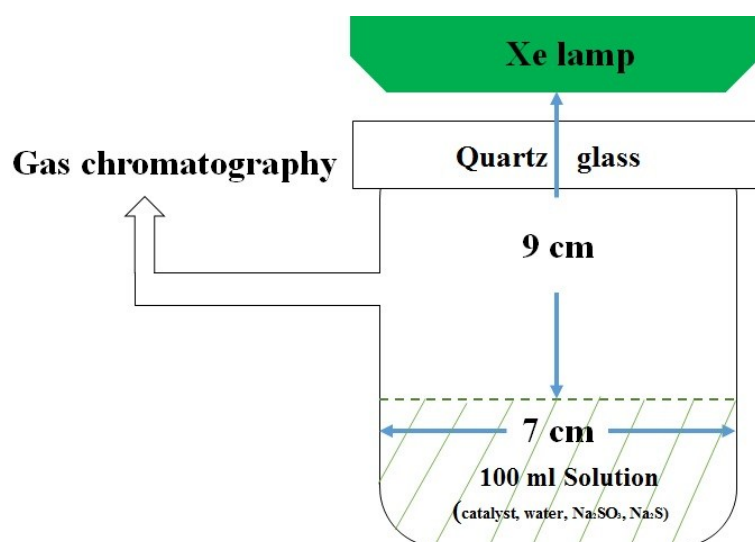

**Figure S1.** Schematic diagram of experimental setup for the photocatalytic evaluation.

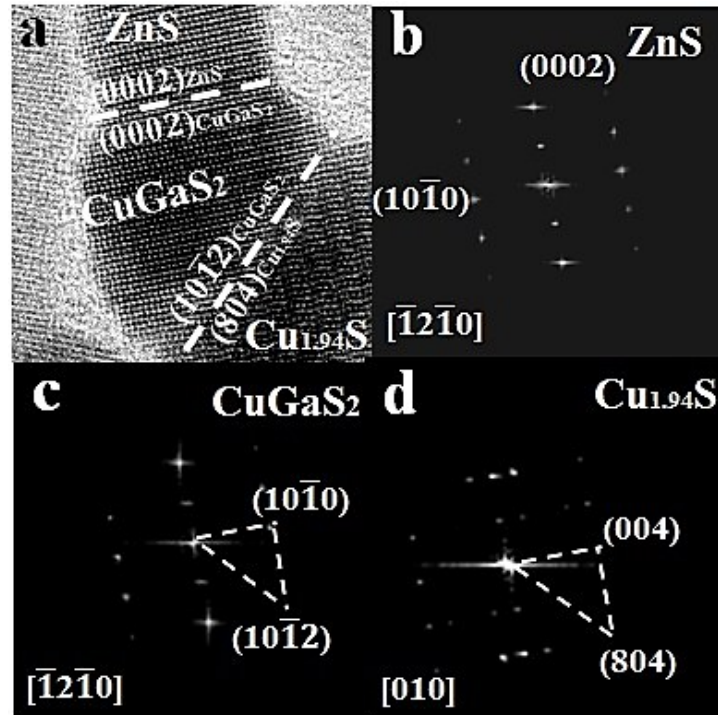

**Figure S2.** (a) HRTEM image showing the middle segment of a  $\text{Cu}_{1.94}\text{S}$ - $\text{CuGaS}_2$ - $\text{ZnS}$  trimer; (b), (c) and (d) FFT patterns taken from  $\text{ZnS}$ ,  $\text{CuGaS}_2$  and  $\text{Cu}_{1.94}\text{S}$  regions, respectively.
